# Supplementary material for: Association Between Self‐Reported Potentially Modifiable Cardiac Risk Factors and Perceived Need to Improve Physical Health: A Population‐Based Study
Source: PubMed Central journal article supplement (PMC5524095; doi:10.1161/jaha.117.005491), 2017-05-03
Supplement: JAH3-6-e005491-s001.pdf [file JAH3-6-e005491-s001.pdf]

## SUPPLEMENTAL MATERIAL

**Table S1.** Prevalence of perceiving a need to improve physical health according to respondent demographics and potentially modifiable cardiac risk factors from the 2013-2014 Canadian Community Health Survey

|                                  | Overall sample | Number reporting PNIPH | Weighted % reporting PNIPH* | <i>P</i> value <sup>†</sup> |
|----------------------------------|----------------|------------------------|-----------------------------|-----------------------------|
| Age, y                           |                |                        |                             |                             |
| 18-39                            | 6440           | 4854                   | 77.7                        | <0.001                      |
| 40-59                            | 7845           | 5889                   | 74.6                        |                             |
| ≥60                              | 12 030         | 6996                   | 60.5                        |                             |
| Sex                              |                |                        |                             |                             |
| Men                              | 11 438         | 7651                   | 72.2                        | 0.267                       |
| Women                            | 14 877         | 10 088                 | 71.4                        |                             |
| Marital status                   |                |                        |                             |                             |
| Married/common-law               | 14 434         | 10 018                 | 72.6                        | <0.001                      |
| Widowed/separated/divorced       | 6269           | 3685                   | 62.6                        |                             |
| Single, never married            | 5612           | 4036                   | 74.7                        |                             |
| Cultural or racial origin        |                |                        |                             |                             |
| White                            | 21 717         | 14 606                 | 72.5                        | <0.001                      |
| Visible minority                 | 4018           | 2806                   | 70.8                        |                             |
| Unknown                          | 580            | 327                    | 60.8                        |                             |
| Education                        |                |                        |                             |                             |
| Less than sec. school grad       | 4189           | 2307                   | 60.2                        | <0.001                      |
| Sec. school grad, no post-sec    | 5802           | 3899                   | 71.3                        |                             |
| Post-sec. education <sup>‡</sup> | 15 949         | 11 286                 | 73.9                        |                             |
| Unknown                          | 375            | 247                    | 72.4                        |                             |
| Annual household income          |                |                        |                             |                             |
| ≤\$39,999                        | 9119           | 5491                   | 65.5                        | <0.001                      |
| \$40,000-\$79,999                | 8924           | 6144                   | 70.3                        |                             |
| ≥\$80,000                        | 8272           | 6104                   | 77.2                        |                             |
| Having a regular medical doctor  |                |                        |                             |                             |
| Yes                              | 23 398         | 15 602                 | 70.7                        | <0.001                      |
| No                               | 2917           | 2137                   | 77.9                        |                             |
| Smoker <sup>§</sup>              |                |                        |                             |                             |
| Yes                              | 5190           | 4103                   | 82.0                        | <0.001                      |
| No                               | 21 125         | 13 636                 | 69.3                        |                             |
| Obesity <sup>  </sup>            |                |                        |                             |                             |
| Yes                              | 5460           | 4378                   | 84.0                        | <0.001                      |
| No                               | 19 899         | 12 741                 | 69.1                        |                             |
| Unknown                          | 956            | 620                    | 68.3                        |                             |
| Physical activity <sup>#</sup>   |                |                        |                             |                             |
| Low                              | 13 042         | 9338                   | 76.2                        | <0.001                      |
| High                             | 13 273         | 8401                   | 68.0                        |                             |

|                                 |        |        |      |        |
|---------------------------------|--------|--------|------|--------|
| Stress                          |        |        |      |        |
| High                            | 6505   | 4981   | 79.9 | <0.001 |
| Low                             | 19 527 | 12 598 | 68.5 |        |
| Unknown                         | 283    | 160    | 58.3 |        |
| Hypertension                    |        |        |      |        |
| Yes                             | 8735   | 5618   | 67.7 | <0.001 |
| No                              | 17 580 | 12 121 | 73.1 |        |
| Diabetes                        |        |        |      |        |
| Yes                             | 2426   | 1588   | 69.0 | 0.057  |
| No                              | 23 889 | 16 151 | 72.0 |        |
| Fruit and vegetable consumption |        |        |      |        |
| <5 times/day                    | 15 376 | 10 826 | 75.0 | <0.001 |
| ≥5 times/day                    | 9344   | 6064   | 67.7 |        |
| Unknown                         | 1595   | 849    | 58.7 |        |
| Alcohol intake                  |        |        |      |        |
| Abstinent                       | 5905   | 3409   | 62.5 | <0.001 |
| Excessive (≥4 drinks/week)      | 3704   | 2540   | 73.4 |        |
| Low/mod. (<4 drinks/week)       | 16 422 | 11 626 | 74.5 |        |
| Unknown                         | 284    | 164    | 61.5 |        |
| No. of PMRFs                    |        |        |      |        |
| 0                               | 1815   | 1002   | 57.2 | <0.001 |
| 1                               | 4787   | 2932   | 66.4 |        |
| 2                               | 6978   | 4585   | 71.7 |        |
| 3                               | 6413   | 4533   | 74.3 |        |
| 4                               | 3985   | 2926   | 79.1 |        |
| ≥5                              | 2337   | 1761   | 80.9 |        |
| No. of PMRFs                    |        |        |      |        |
| <3                              | 13 580 | 8519   | 67.9 | <0.001 |
| ≥3                              | 12 735 | 9220   | 76.8 |        |

PMRF: potentially modifiable cardiac risk factor; PNIPH: perceived need to improve physical health

\* Weighted to the general population

† Chi-square test of independence between variable and PNIPH

‡ With or without obtaining a post-secondary certificate/diploma or university degree

§ Defined as current smoker or having quit smoking within the preceding 12 months

|| Defined as body mass index ≥30 kg/m<sup>2</sup>

# Reported mean total daily energy expenditure <1.7 kcal/kg/day on transportation and leisure time activities (approximating <4 hours of moderate exercise/week)
